# Supplementary material for: The UCSC Xena platform for public and private cancer genomics data visualization and interpretation
Source: bioRxiv or medRxiv preprint supplement (doi:10.1101/326470), 2019-09-26
Supplement: Supplementary file [file 326470-1.pdf]

Samples (N=321)

Cancer Type

Malignant Lymphoma : Germinal center B-cell derived lymphomas

Chronic Lymphocytic Leukemia : CLL with mutated and unmutated IgVH

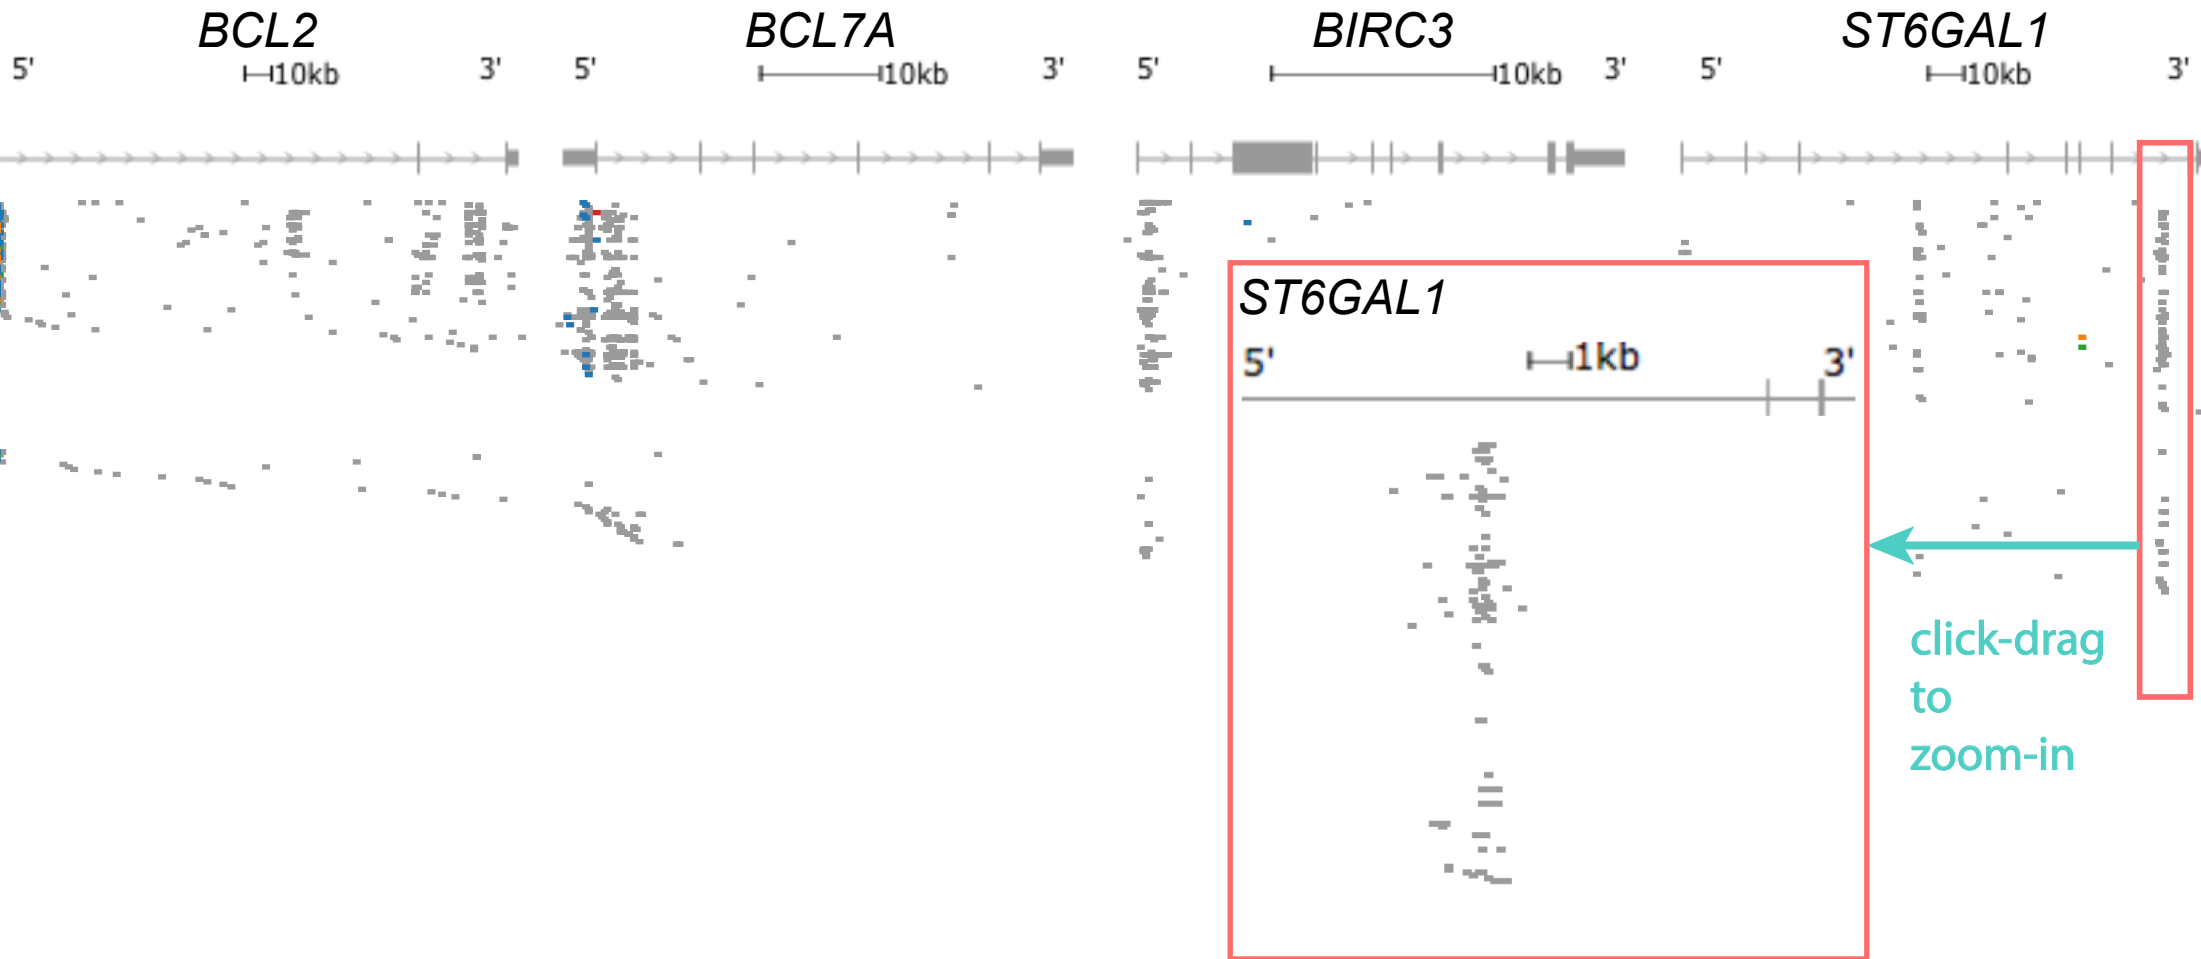

**Variant Impact**

Deleterious

Splicing

Missense / in-frame INDEL

Silent

Unknown impact
