# Supplementary material for: The UCSC Xena platform for public and private cancer genomics data visualization and interpretation
Source: bioRxiv or medRxiv preprint supplement (doi:10.1101/326470), 2019-09-26

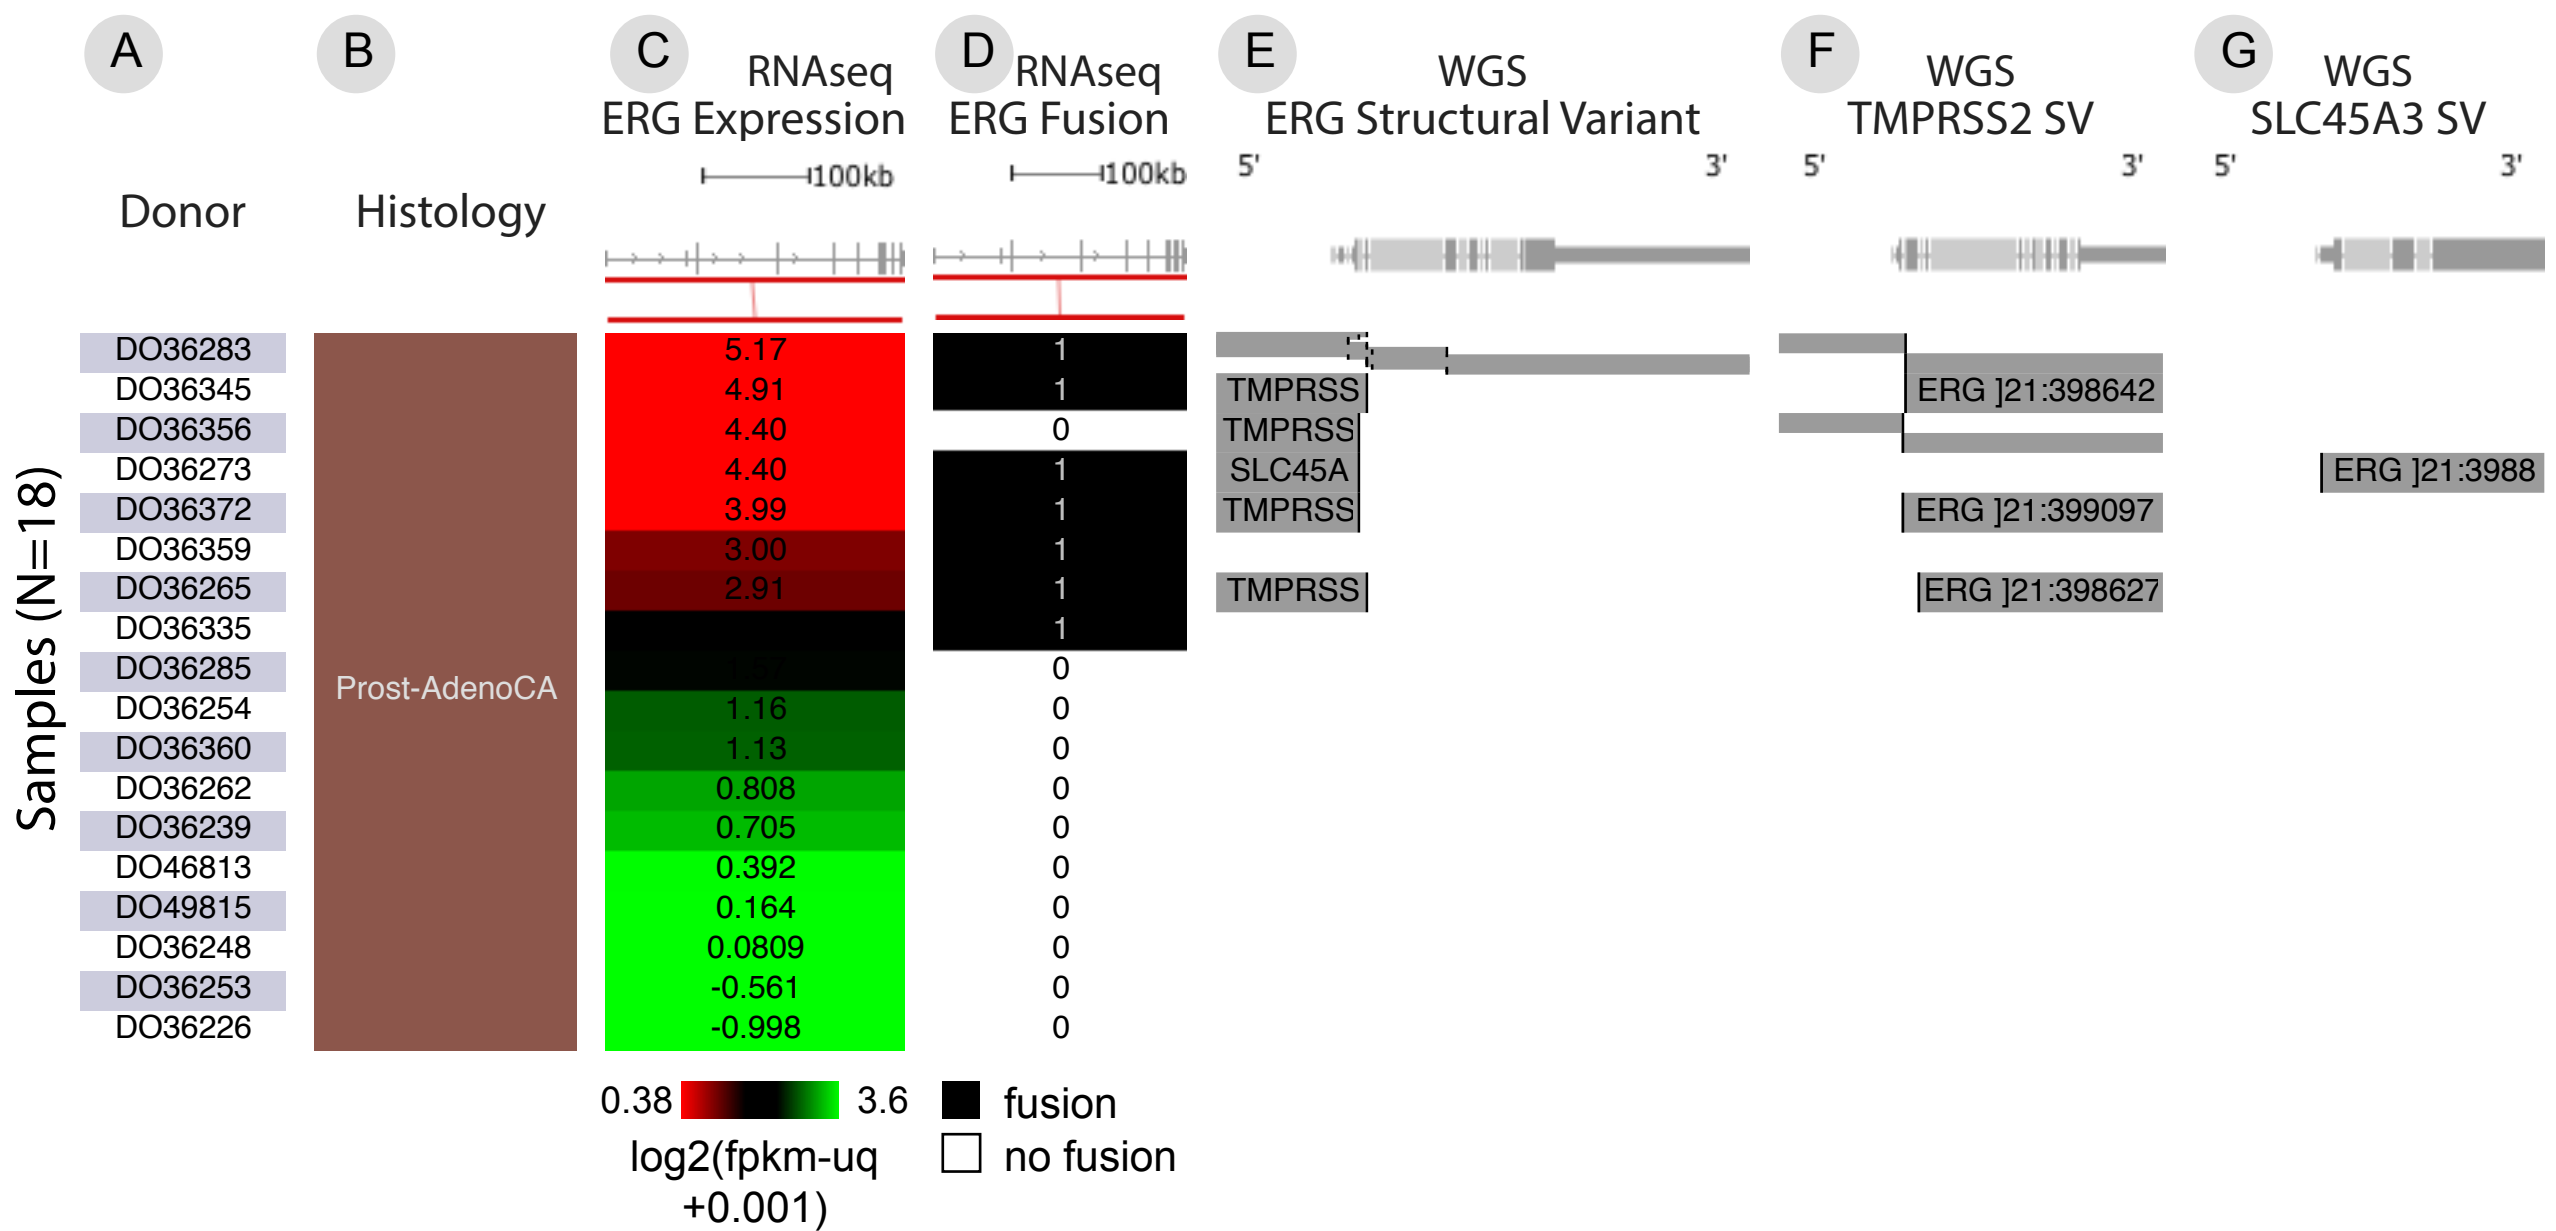

Supplement: Supplementary file [file 326470-2.pdf]
