# Supplementary material for: The UCSC Xena platform for public and private cancer genomics data visualization and interpretation
Source: bioRxiv or medRxiv preprint supplement (doi:10.1101/326470), 2019-09-26

TERT Expression  
log<sub>2</sub>(normalized count +1)

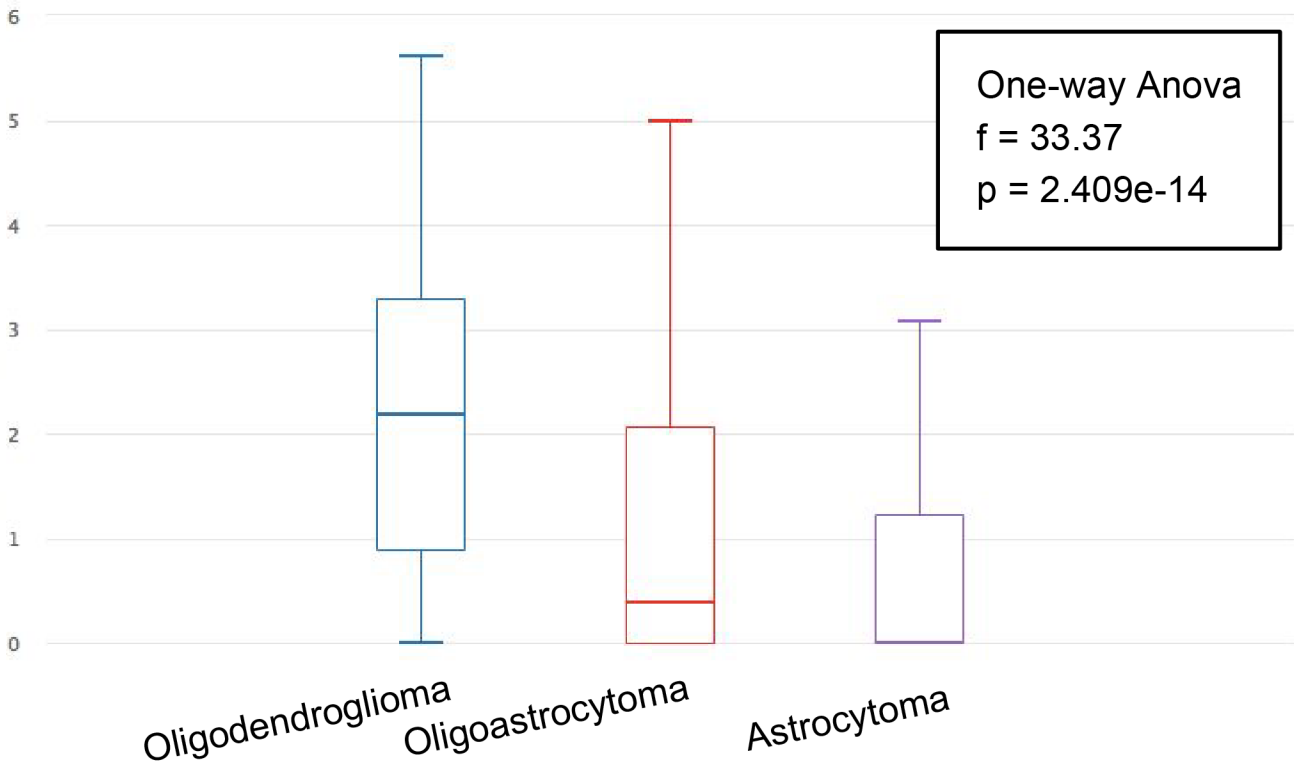

Supplement: Supplementary file [file 326470-3.pdf]
